# Supplementary material for: Ubiquitin Specific Protease 29 Functions as an Oncogene Promoting Tumorigenesis in Colorectal Carcinoma
Source: MDPI journal article supplement (doi:10.3390/cancers13112706), 2021-05-31
Supplement: s1 [file s1]

**Table S1.** Patient information of TMA were listed (Clinicopathological information is not available)

| No. | Patient info | Sex | Age | Carcinoma      |
|-----|--------------|-----|-----|----------------|
| 1   | Patient 1    | M   | 82  | Adenocarcinoma |
| 2   | Patient 2    | M   | 86  | Adenocarcinoma |
| 3   | Patient 3    | M   | 81  | Adenocarcinoma |
| 4   | Patient 4    | M   | 81  | Adenocarcinoma |
| 5   | Patient 5    | M   | 43  | Adenocarcinoma |
| 6   | Patient 6    | M   | 68  | Adenocarcinoma |
| 7   | Patient 7    | F   | 78  | Adenocarcinoma |
| 8   | Patient 8    | F   | 71  | Adenocarcinoma |
| 9   | Patient 9    | F   | 67  | Adenocarcinoma |
| 10  | Patient 10   | F   | 70  | Adenocarcinoma |
| 11  | Patient 11   | M   | 54  | Adenocarcinoma |
| 12  | Patient 12   | M   | 72  | Adenocarcinoma |
| 13  | Patient 13   | M   | 69  | Adenocarcinoma |
| 14  | Patient 14   | M   | 86  | Adenocarcinoma |
| 15  | Patient 15   | M   | 76  | Adenocarcinoma |
| 16  | Patient 16   | F   | 84  | Adenocarcinoma |
| 17  | Patient 17   | M   | 70  | Adenocarcinoma |
| 18  | Patient 18   | M   | 56  | Adenocarcinoma |
| 19  | Patient 19   | M   | 90  | Adenocarcinoma |
| 20  | Patient 20   | F   | 48  | Adenocarcinoma |
| 21  | Patient 21   | F   | 69  | Adenocarcinoma |
| 22  | Patient 22   | F   | 75  | Adenocarcinoma |
| 23  | Patient 23   | M   | 67  | Adenocarcinoma |
| 24  | Patient 24   | F   | 70  | Adenocarcinoma |
| 25  | Patient 25   | M   | 63  | Adenocarcinoma |
| 26  | Patient 26   | M   | 57  | Adenocarcinoma |
| 27  | Patient 27   | M   | 50  | Adenocarcinoma |
| 28  | Patient 28   | M   | 67  | Adenocarcinoma |
| 29  | Patient 29   | F   | 56  | Adenocarcinoma |
| 30  | Patient 30   | F   | 71  | Adenocarcinoma |
| 31  | Patient 31   | M   | 58  | Adenocarcinoma |

|    |            |   |    |                |
|----|------------|---|----|----------------|
| 32 | Patient 32 | F | 52 | Adenocarcinoma |
|----|------------|---|----|----------------|
